# Supplementary material for: Blood Lead Influences the Anemia Status of Malaria-Infected Children in Katanga Kampala Uganda
Source: Preprints.org preprint supplement (doi:10.20944/preprints201907.0355.v1), 2019-07-31
Supplement: Supplementary file 2 [file supplementary]

## Sheet: Sheet1
BLL	Hb	PD x103	FEP/Hb	CAT
3.1	5.7	3.307	20.5405	2.3– 3.3
3.2	4.8	1.51	20.7632	1.2-– 2.2
4.7	5.8	1.806	4.73684	1.2-– 2.2
2.9	5.4	4.961	15.2273	4.5 – 5.5
3.2	5.7	1.618	13.617	1.2-– 2.2
3.4	4.9	3.546	13.2653	3.4 – 4.4
3.7	6.9	4.112	15.5102	3.4 – 4.4
3.8	6.9	2.345	16.7347	2.3– 3.3
4.4	6.2	4.672	12.7451	4.5 – 5.5
4.4	6.6	5.312	13.9216	4.5 – 5.5
4.8	6.9	6.471	7.64706	5.6 – 6.6
4.9	7.2	6.011	11.9231	5.6 – 6.6
4.9	6.8	5.213	15	4.5 – 5.5
4.9	6.2	2.862	15	2.3– 3.3
5	6.7	2.287	16.283	1.2-– 2.2
5.6	6.3	4.563	11.1321	4.5 – 5.5
5.4	7.3	1.64	11.6981	1.2-– 2.2
5.1	7.4	3.362	12.5926	2.3– 3.3
3.4	4.9	3.546	13.2653	3.4 – 4.4
3.7	6.9	4.112	15.5102	3.4 – 4.4
5.4	7.6	4.221	14.8036	3.4 – 4.4
5.3	8.7	4.023	12.6316	3.4 – 4.4
5.4	7.8	1.04	15.8621	0 .1-– 1.1
5.5	8.8	5.111	5.51724	4.5 – 5.5
5.5	7.9	0.716	13.7288	0 .1-– 1.1
5.6	6.1	1.133	15.1695	0 .1-– 1.1
5.7	5.9	3.291	9.49153	2.3– 3.3
5.8	6.3	4.592	13.0508	4.5 – 5.5
5.9	6.9	6.225	12.2034	5.6 – 6.6
5.9	6.6	6.278	8.30508	5.6 – 6.6
5.9	6.4	1.442	12.8814	1.2-– 2.2
5.9	5.9	1.49	13.5424	1.2-– 2.2
5.9	5.9	1.622	11.1864	1.2-– 2.2
6.1	5.9	1.672	14.7458	1.2-– 2.2
6.2	6.7	1.525	7.33333	1.2-– 2.2
6.2	6.8	1.992	11.5	1.2-– 2.2
6.4	6.8	0.954	10.8197	0 .1-– 1.1
6.4	7.1	1.356	12.9344	1.2-– 2.2
6.6	6.2	1.973	7.22951	1.2-– 2.2
6.6	6.2	4.68	11.6129	4.5 – 5.5
6.7	6.3	0.34	15.5556	0 .1-– 1.1
6.8	6.4	3.781	4.53125	3.4 – 4.4
6.8	6.7	5.336	9.21875	4.5 – 5.5
6.9	6.4	2.9	10	2.3– 3.3
7.2	6.6	6.929	9.39394	6.7 – 7.7
7.2	7.1	1.24	13.3333	1.2-– 2.2
7.2	6.6	2.851	5.60606	2.3– 3.3
7.3	8.1	1.18	10.8657	0 .1-– 1.1
7.3	6.8	4.107	7.76119	3.4 – 4.4
7.7	6.7	1.593	10.4478	1.2-– 2.2
7.7	6.7	1.646	9.25373	1.2-– 2.2
7.9	5.6	3.171	11.9704	2.3– 3.3
7.9	6.8	0.185	12.6471	0 .1-– 1.1
7.9	8	3.733	6.61765	3.4 – 4.4
8	6.8	3.97	8.23529	3.4 – 4.4
8.1	7.8	1.333	12.3382	1.2-– 2.2
8.1	6.9	0.56	10.4348	0 .1-– 1.1
8.2	7.8	1.575	4.31884	1.2-– 2.2
8.2	6.9	1.703	11.3043	1.2-– 2.2
8.3	7	2.667	5.42857	2.3– 3.3
8.4	7.8	1.032	10.9859	0 .1-– 1.1
8.3	7.1	2.587	3.43662	2.3– 3.3
8.3	7.5	4.245	9.58333	3.4 – 4.4
8.3	7.2	6	5.69444	5.6 – 6.6
8.5	7.3	2.456	9.45205	2.3– 3.3
8.6	7.4	1.982	10.4054	1.2-– 2.2
7.9	7.4	2.43	8.78378	2.3– 3.3
8.7	7.6	1.495	11.3158	1.2-– 2.2
8.8	7.7	4.28	8.05195	3.4 – 4.4
8.8	7.7	1.76	5.71429	1.2-– 2.2
8.8	7.8	0.381	9.74359	0 .1-– 1.1
8.9	7.8	0.93	7.9359	0 .1-– 1.1
8.9	7.9	0.771	7.58228	0 .1-– 1.1
9	7.9	3.882	8.35443	3.4 – 4.4
9.1	7.9	4.92	5.56962	4.5 – 5.5
9.2	7.9	6.02	4.93671	5.6 – 6.6
9.2	7.9	1.497	7.70886	1.2-– 2.2
9.2	8	1.621	7.375	1.2-– 2.2
9.2	8.1	3.742	8.14815	3.4 – 4.4
9.3	8.1	3.951	8.39506	3.4 – 4.4
9.3	8.1	2.374	4.19753	2.3– 3.3
9.4	8.2	3.877	5.85366	3.4 – 4.4
9.5	8.2	1.567	8.45122	1.2-– 2.2
9.5	8.2	2.762	2.80488	2.3– 3.3
9.6	8.2	3	1.46341	2.3– 3.3
9.7	8.2	3.093	4.39024	2.3– 3.3
9.7	8.3	0.985	8.09639	0 .1-– 1.1
9.8	8.3	3.821	5.3012	3.4 – 4.4
9.8	8.3	4.057	6.98795	3.4 – 4.4
9.9	8.3	4.41	7.22892	3.4 – 4.4
9.9	7.3	6.098	3.85542	5.6 – 6.6
9.9	8.3	2.79	3.37349	2.3– 3.3
9.9	8.6	4.671	5.23256	4.5 – 5.5
10	8.6	1.75	5.69767	1.2-– 2.2
10.2	8.7	3.157	7.86207	2.3– 3.3
10.3	8.8	1.518	4.88636	1.2-– 2.2
10.3	8.8	3.28	5	2.3– 3.3
10.4	8.8	6.413	5	5.6 – 6.6
10.5	8.8	2.557	7.27273	2.3– 3.3
10.6	8.9	0.217	13.5955	0 .1-– 1.1
10.7	7.9	6.012	6.17978	5.6 – 6.6
10.8	9	2.296	2.61111	1.2-– 2.2
10.9	9.2	1.579	3.15217	1.2-– 2.2
10.9	9.2	3.27	7.3913	2.3– 3.3
10.9	9.2	4.336	6.95652	3.4 – 4.4
11	6.2	7.116	3.04348	6.7 – 7.7
11.1	9.3	4.698	6.02151	4.5 – 5.5
11.2	9.5	4.423	6.73684	3.4 – 4.4
11.2	9.7	3.737	4.84536	3.4 – 4.4
11.3	9.7	3.147	3.91753	2.3– 3.3
11.3	6.8	5.643	4.28571	5.6 – 6.6
11.4	9.9	2.162	5.65657	1.2-– 2.2
11.5	9.9	3.745	4.24242	3.4 – 4.4
11.7	9.9	3.789	3.83838	3.4 – 4.4
11.8	9.9	3.21	5.85859	2.3– 3.3
11.8	10	2.787	1.97	2.3– 3.3
11.9	10.2	0.762	6.59804	0 .1-– 1.1
11.9	5.2	6.873	2.35294	6.7 – 7.7
12	10.2	2.882	5.58824	2.3– 3.3
12.4	6.3	4.881	1.84466	4.5 – 5.5
12.5	10.4	2.932	2.11538	2.3– 3.3
12.8	7.9	5.912	3.02752	5.6 – 6.6
12.8	10.9	1.984	2.11009	1.2-– 2.2
12.9	10.9	3.223	1.65138	2.3– 3.3
12.9	11.1	2.987	1.08108	2.3– 3.3
13.3	11.2	5.523	2.05357	4.5 – 5.5
13.6	11.3	5.527	2.83186	4.5 – 5.5
13.8	11.4	4.95	6.84211	4.5 – 5.5
13.9	11.8	5.28	1.44068	4.5 – 5.5
14.3	11.9	1.23	5.96639	1.2-– 2.2
14.9	12	3.036	1.08333	2.3– 3.3
15.9	12	3.174	1.13333	2.3– 3.3
16.8	12.4	3.245	2.74194	2.3– 3.3
17.9	7.9	5.182	2.17054	4.5 – 5.5
23.7	13.1	3.172	0.984733	2.3– 3.3
7.9	8.9	1.18	5	0 .1-– 1.1
8.9	8.9	1.973	7.27273	1.2-– 2.2
9.4	8.9	1.525	13.5955	1.2-– 2.2
12.8	6.9	2.587	12.6471	2.3– 3.3
12.9	7.1	4.245	6.61765	3.4 – 4.4
11	7.8	6	8.23529	5.6 – 6.6
10.8	8.1	2.456	12.3382	2.3– 3.3
12.1	7.6	1.982	10.4348	1.2-– 2.2
13.8	8.2	2.43	9.7	2.3– 3.3
9.1	7.3	1.495	11.3043	1.2-– 2.2
14.3	6.9	4.28	9	3.4 – 4.4
14.9	6.9	1.76	10.9859	1.2-– 2.2
9.3	7.1	3.211	8.9	2.3– 3.3
12.6	7.8	4.961	11.3043	4.5 – 5.5
10.8	6.9	3.546	5.42857	3.4 – 4.4
11.8	7.7	4.112	10.9859	3.4 – 4.4
12.3	7.9	5.312	3.43662	4.5 – 5.5
9.9	6.8	6.471	9.58333	5.6 – 6.6
11.7	5.1	6.011	5.69444	5.6 – 6.6
13.6	8.7	5.213	9.45205	4.5 – 5.5
14	8.8	2.862	10.4054	2.3– 3.3
11.2	7.1	2.287	8.78378	1.2-– 2.2
13.3	6.2	4.563	11.3158	4.5 – 5.5
15.3	6.8	3.362	8.05195	2.3– 3.3
10.4	7.3	3.578	5.71429	3.4 – 4.4
9.1	7.4	5.308	9.74359	4.5 – 5.5
13.8	6.4	4.221	7.9359	3.4 – 4.4
12.3	7.9	4.023	7.58228	3.4 – 4.4
13.2	7.8	4.221	8.35443	3.4 – 4.4
8.6	6.7	7.431	6.61765	6.7 – 7.7
9.7	6.8	5.618	8.23529	5.6 – 6.6
7.8	8.6	3.546	12.3382	3.4 – 4.4
6.9	9.3	4.112	10.4348	3.4 – 4.4
8.1	6.9	2.345	4.31884	2.3– 3.3
7.8	7.9	4.672	11.3043	4.5 – 5.5
8.4	7.4	5.312	5.42857	4.5 – 5.5
9.1	6.8	6.471	10.9859	5.6 – 6.6
7.9	8.8	6.011	3.43662	5.6 – 6.6
8.9	7.9	5.213	9.58333	4.5 – 5.5
9.4	9.1	2.862	5.69444	2.3– 3.3
8.5	6.9	2.287	9.45205	1.2-– 2.2
8.2	7.3	4.563	10.4054	4.5 – 5.5
7.9	6.8	6.732	8.78378	6.7 – 7.7
8.6	7.9	3.362	11.3158	2.3– 3.3
7.9	6.7	5.578	8.05195	4.5 – 5.5
9.6	7.9	5.308	5.71429	4.5 – 5.5
8.7	8.6	4.221	9.74359	3.4 – 4.4
8.6	8.7	4.023	7.9359	3.4 – 4.4
7.7	7.9	6.543	7.58228	5.6 – 6.6
8.7	8.6	5.111	8.35443	4.5 – 5.5
8.3	6.9	7.116	5.56962	6.7 – 7.7
8.6	7.9	6.133	4.93671	5.6 – 6.6
7.5	8.9	3.291	7.70886	2.3– 3.3
8.1	7.9	4.592	7.375	4.5 – 5.5
8.6	7.8	6.225	8.14815	5.6 – 6.6
9.1	8.9	6.278	8.39506	5.6 – 6.6
10.9	5.8	5.312	9.25373	4.5 – 5.5
11	4.4	6.471	11.9704	5.6 – 6.6
12.1	4.7	6.011	12.4	5.6 – 6.6
11.2	4.9	5.213	6.61765	4.5 – 5.5
9.2	4.9	7.453	8.23529	6.7 – 7.7
13.3	4.9	6.873	12.3382	6.7 – 7.7
11.3	5.1	8.543	10.4348	7.8 –8.8
